# Supplementary material for: Reduction of ferrylmyoglobin by cysteine as affected by pH
Source: Royal Society of Chemistry journal article supplement (doi:10.1039/c4ra10562a), 2014-01-01

Table S1. Quality of the non-linear fitting as evaluated by residual values (%) for the derived pseudo-first-order rate constant  $k_1$ - $k_6$  for each concentration of cysteine for the reduction of MbFe(IV)=O and metMbFe(III) by cysteine at 25.0 °C and varying pH. Total residual values (%) for the derived pseudo-first-order rate constants  $k_1$ - $k_3$  (pH 6, 7, and 8) and  $k_4$ - $k_6$  (pH 9) for each [cysteine] excess. Total residual values are the residual divided by the sum of all Y-values.

| [cysteine] / $10^{-3}$ mol·l <sup>-1</sup> | Residuals k1 | Residuals k2 | Residuals k3 | Total residuals |
|--------------------------------------------|--------------|--------------|--------------|-----------------|
| <b>pH 6</b>                                |              |              |              |                 |
| 0.94                                       | 9.93         | 5.88         | 5.28         | 7.32            |
| 1.57                                       | 10.4         | 6.21         | 4.91         | 7.42            |
| 3.14                                       | 10.3         | 6.65         | 3.74         | 6.19            |
| 6.29                                       | 10.4         | 4.43         | 3.40         | 5.41            |
| 9.43                                       | 9.98         | 4.60         | 2.99         | 4.87            |
| <b>pH 7</b>                                |              |              |              |                 |
| 0.94                                       | 21.3         | 10.2         | 6.61         | 11.7            |
| 1.57                                       | 20.6         | 11.1         | 6.78         | 11.5            |
| 3.14                                       | 17.4         | 9.51         | 3.52         | 7.17            |
| 6.30                                       | 14.9         | 9.94         | 2.44         | 5.17            |
| 9.43                                       | 13.1         | 10.1         | 1.69         | 3.79            |
| <b>pH 8</b>                                |              |              |              |                 |
| 0.94                                       | 13.0         | 22.0         | 4.73         | 8.67            |
| 1.57                                       | 15.9         | 26.1         | 5.25         | 9.34            |
| 3.14                                       | 14.2         | 32.7         | 3.87         | 7.56            |
| 6.30                                       | 15.3         | 51.7         | 3.76         | 7.33            |
| 9.43                                       | 14.8         | 48.9         | 3.27         | 4.41            |
| [cysteine] / $10^{-3}$ mol·l <sup>-1</sup> | Residuals k4 | Residuals k5 | Residuals k6 | Total residuals |
| <b>pH 9</b>                                |              |              |              |                 |
| 0.94                                       | 4.40         | 1.39         | 46.7         | 2.76            |
| 1.57                                       | 5.40         | 1.40         | 39.4         | 2.79            |
| 3.14                                       | 3.11         | 1.29         | 24.3         | 2.64            |
| 6.30                                       | 2.79         | 0.80         | 8.57         | 1.61            |
| 9.43                                       | 2.24         | 1.11         | 2.65         | 1.44            |

Figure S1. Electronic absorption spectrum recorded at pH 7.4 in phosphate buffer (0.16 M) for **A**)  $5 \times 10^{-5} \text{ mol l}^{-1}$  of MbFe(III); **B**)  $5 \times 10^{-5} \text{ mol l}^{-1}$  of MbFe(IV)=O; and **C**) Sulfmyoglobin, spectra recorded after the reduction of  $5 \times 10^{-5} \text{ mol l}^{-1}$  of ferrylmyoglobin by excess of  $\text{H}_2\text{S}$ . **D**)  $5 \times 10^{-4} \text{ mol l}^{-1}$  of cysteine.

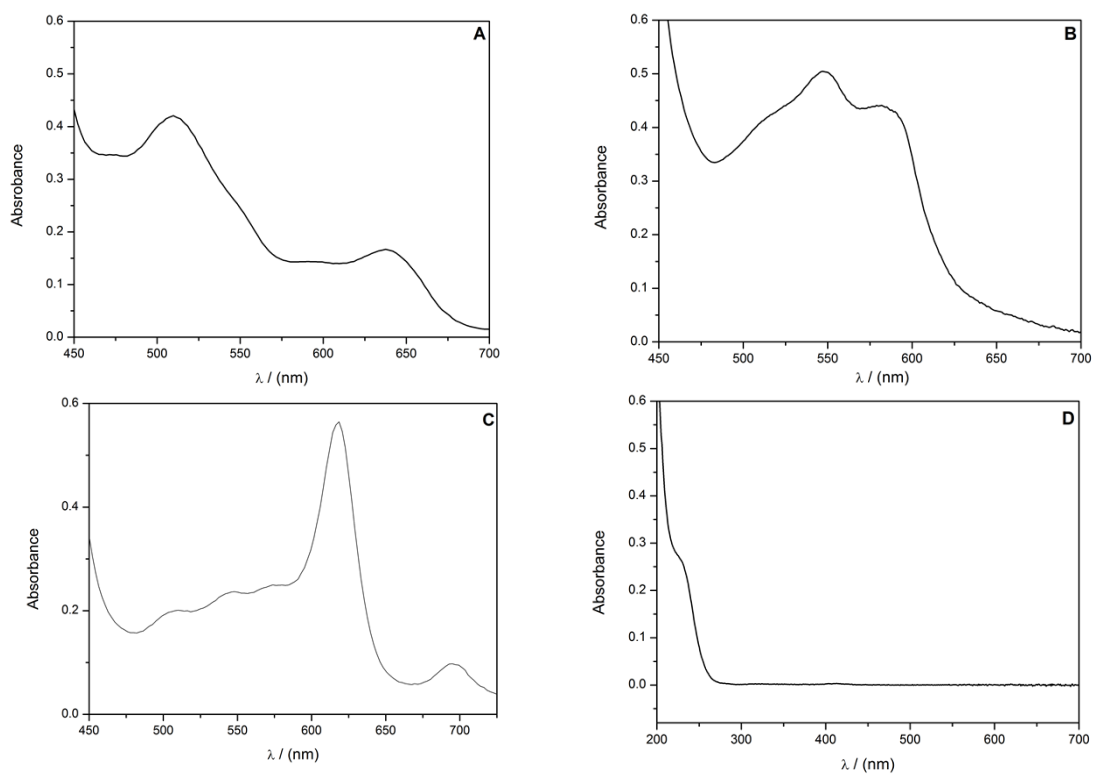

Supplement: c4ra10562a1.pdf [file c4ra10562a1.pdf]
